# Supplementary material for: A Probiotic Bacillus amyloliquefaciens D-1 Strain Is Responsible for Zearalenone Detoxifying in Coix Semen
Source: MDPI journal article supplement (doi:10.3390/toxins15120674), 2023-11-28
Supplement: s1 [file s1]

# A probiotic *Bacillus amyloliquefaciens* D-1 strain is responsible for zearalenone detoxifying in coix semen

Tao Deng <sup>1,†</sup>, Yefei Chen <sup>1,†</sup>, Jinqiang Zhang <sup>1</sup>, Yanping Gao <sup>1</sup>, Changgui Yang <sup>1</sup>, Weike Jiang <sup>1</sup>, Xiaohong Ou <sup>1</sup>, Yanhong Wang <sup>1</sup>, Lanping Guo <sup>2</sup>, Tao Zhou <sup>1,\*</sup> and Qing-Song Yuan <sup>1,2,\*</sup>

<sup>1</sup> Resource Institute for Chinese & Ethnic Materia Medica, Guizhou University of Traditional Chinese Medicine, Guiyang 550025, China; td18300850597@163.com (T.D.); jqz18215598296@139.com (J.Z.); gaoyanping1121@foxmail.com (Y.G.); cgy15285135045@163.com (C.Y.); jwk\_88@163.com (W.J.); yanhong824@hotmail.com (Y.W.)

<sup>2</sup> National Resource Center for Chinese Meteria Medica, State Key Laboratory for Quality Ensurance and Sustainable Use of Dao-di Herbs, Beijing 100700, China; glp01@126.com

\* Correspondence: zhoutao700@gycm.edu (T.Z.); yuanqingsong006@gzy.edu.cn (Q.-S.Y.)

† These authors contributed equally to this work.

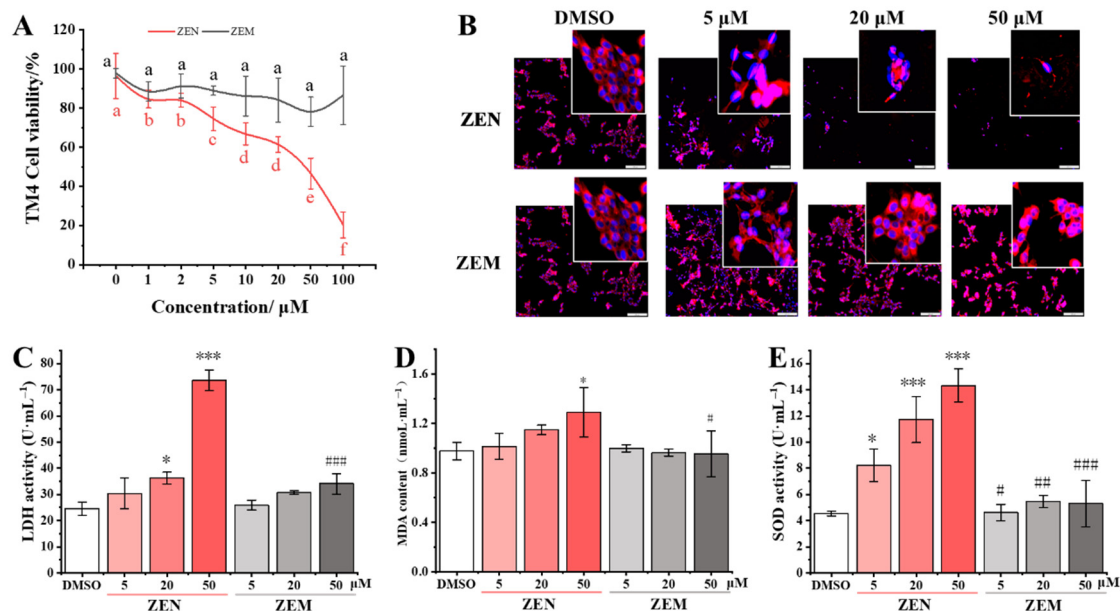

**Figure S1.** Effects of ZEN and its metabolite ZEM on TM4 cells. **(A)** Effects of ZEN and ZEM at different concentrations on the activity of TM4 cells. Letters a, b, c, d, e and f indicate that the ZEM group has a significant difference compared with the ZEN group at  $p < 0.05$  levels with the same concentration ( $n = 6$ ). **(B)** Immunofluorescence staining of TM4 cells. The cell membrane was stained red with Dil and the nucleus was stained blue with Hoechse 33342. **(C, D, and E)** Analysis of the release of LDH, the contents of MDA, and the activity of SOD in TM4 cells, respectively. \*, \*\*, and \*\*\* mean that the ZEN group and ZEM group have significant differences compared with the DMSO group at  $P < 0.05$ ,  $P < 0.01$ , and  $P < 0.005$  levels, respectively ( $n = 6$ ). #, ##, and ### indicate that the ZEM group has a significant difference compared with the ZEN group at  $P < 0.05$ ,  $P < 0.01$ , and  $P < 0.005$  levels with the same concentration, respectively ( $n = 6$ ). .

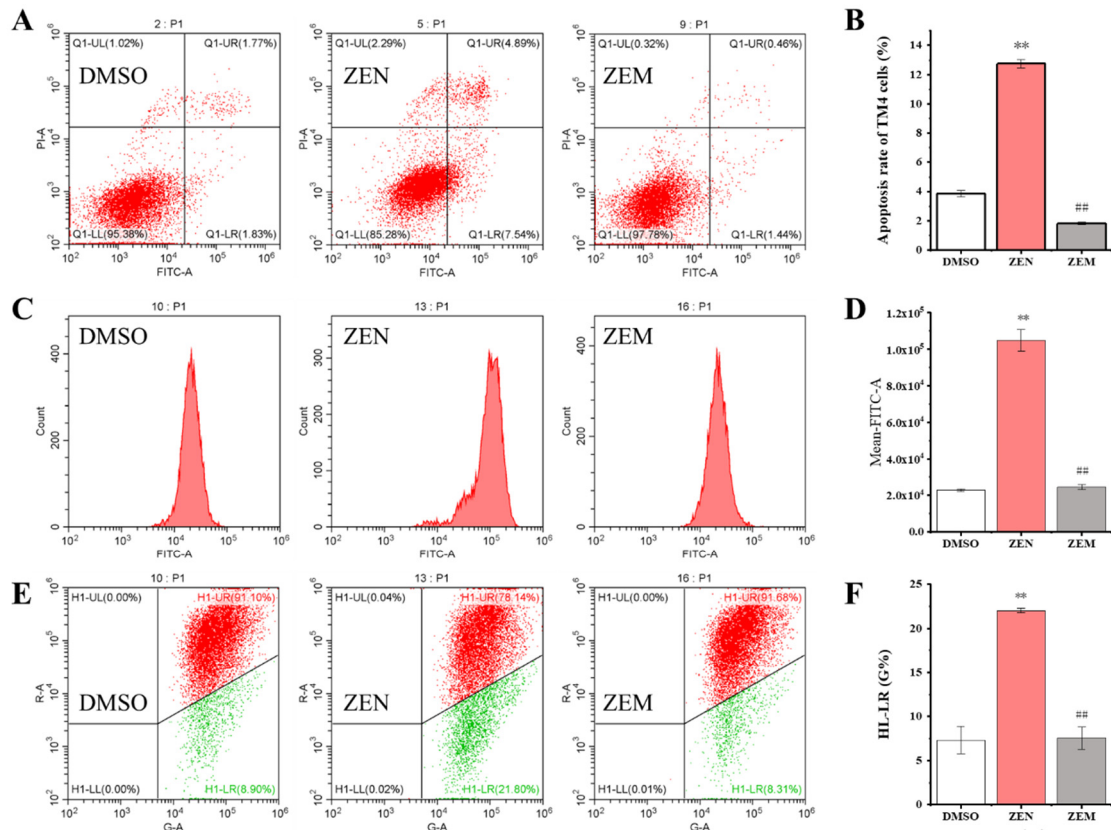

**Figure S2.** Effects of ZEN and its metabolite ZEM on the apoptosis (A, B), ROS (C, D), and mitochondrial membrane potential (E, F) of TM4 cells by flow cytometry. The Q1-UL region represents dead cells, the Q1-LR region represents early apoptotic cells, the Q1-LL region represents surviving cells, and the Q1-UR region represents late apoptotic cells. Normal mitochondria fluorescein red, and decreased or lost mitochondrial membrane potential fluorescein green. \*\* indicates that the ZEN group and ZEM group have significant differences compared with the DMSO group at  $P < 0.01$  level ( $n = 6$ ). ## indicates that the ZEM group has a significant difference compared with the ZEN group at  $P < 0.01$  level ( $n = 6$ ).

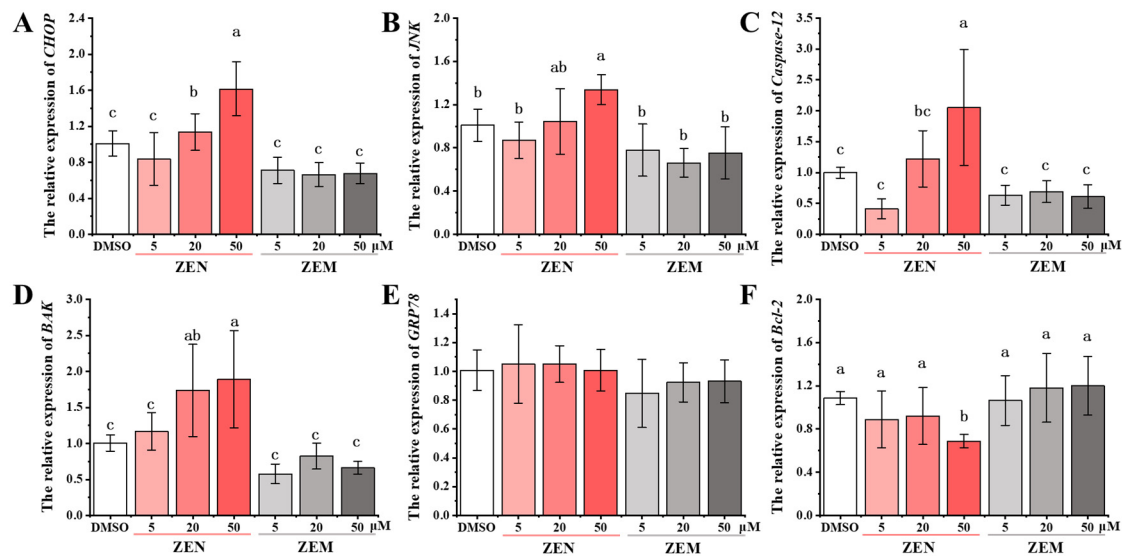

**Figure S3.** Effects of ZEN and its metabolite ZEM on the expression of apoptosis-related genes in TM4 cells by qRT-PCR. Different lowercase letters indicated significant differences among different treatment groups ( $P < 0.05$ ) ( $n = 6$ ).

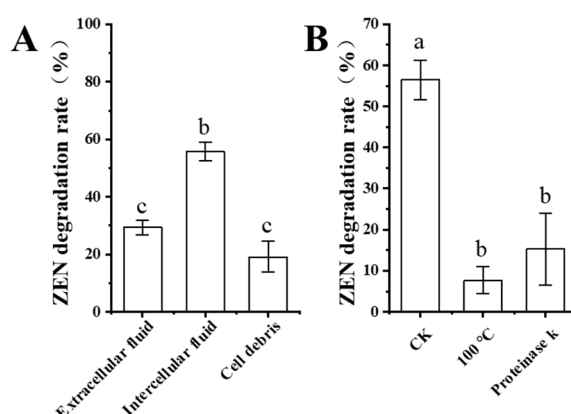

**Figure S4.** Degradation rate of ZEN by different components of D-1 strain. (A) The removal ability of ZEN in intracellular fluid, extracellular fluid, and cell debris of D-1 strain. (B) The ZEN degradation rate of intracellular fluid treated with protease K and boiling water bath. Different lowercase letters indicated significant differences among different treatment groups ( $P < 0.05$ ) ( $n = 3$ ).

**Table S1.** Primer's sequences of identification of strain D-1 and qRT-PCR.

| Genes          | Forward prime (5'-3')  | Reward prime (5'-3')      | Cell/<br>Strain |
|----------------|------------------------|---------------------------|-----------------|
| 16S            | CTACGGGMSGCAGCAG       | GGACTACHVG GGTWTCTAAT     | D-1             |
| $\beta$ -actin | CTGTCCCTGTATGCCTCTG    | TTGATGTCACGCACGATT        |                 |
| JNK            | TCCTCCAAATCCATTACCTCC  | CTCCAGCACCCATACATCAAC     |                 |
| CHOP           | TTCTCCTTCATGCGTTGCTTC  | AAAACCTTCACTACTCTTGACCCTG | HepG2           |
| Caspase-12     | CTCAATAGTGGGCATCTGGGT  | GAAGGTAGGCAAGACTGGTTC     |                 |
| Bax            | GCAAAGTAGAAGAGGGCAACC  | ACTGGACAGCAATATGGAGCT     |                 |
| Bcl-2          | CTCAGGCTGGAAGGAGAAGAT  | AAGCTGTACAGAGGGGCTAC      |                 |
| GAPDH          | GAAGGTGAAGTCCGGAGTC    | GAAGATGGTGATGGGATTTTC     |                 |
| P53            | AATGCTCAGGGCAAGGAA     | CAGGCAGAAGACTAACCAAG      |                 |
| c-JNK          | TCCTCCAAATCCATTACCTCC  | CTCCAGCACCCATACATCAAC     |                 |
| Caspase-8      | GGATGGCCACTGTGAATAACTG | TCGAGGACATCGCTCTCTCA      | TM4             |
| Bax            | CCCGAGAGGTCTTTTCCGAG   | CCAGCCCATGATGGTTCTGAT     |                 |
| Bcl-2          | GAGCCATCTCAGTGTGTGGAG  | TGGGCAAACAGGTCAGCAG       |                 |
| Fas            | CTTTTCGTGAGCTCGTCTCTGA | CTCCCCAGAAGCGTCTTTGA      |                 |
